# Supplementary material for: Platinum-mediated aryl–aryl bond formation and sp3 C–H bond activation
Source: Royal Society of Chemistry journal article supplement (doi:10.1039/c0dt00631a), 2010-01-01
Supplement: c0dt00631a.pdf [file c0dt00631a.pdf]

# Platinum-mediated aryl-aryl bond formation and $sp^3$ C-H bond activation

Margarita Crespo, Teresa Calvet, Mercè Font-Bardia

## SUPPORTING INFORMATION AVAILABLE:

### Experimental procedures and characterization data for all new compounds

#### General

Microanalyses were performed at the *Serveis Científico-Tècnics (Universitat de Barcelona)*. Electrospray mass spectra were performed at the *Servei d'Espectrometria de Masses (Universitat de Barcelona)* in a LC/MSD-TOF spectrometer using H<sub>2</sub>O-CH<sub>3</sub>CN 1:1 to introduce the sample. NMR spectra were performed at the *Unitat de RMN d'Alt Camp de la Universitat de Barcelona* using Bruker DRX-250 (<sup>195</sup>Pt, 54 MHz), Varian Unity 300 (<sup>1</sup>H, 300 MHz; <sup>31</sup>P-{<sup>1</sup>H}, 121.4 MHz), Mercury-400 (<sup>1</sup>H, 400 MHz; <sup>1</sup>H-<sup>1</sup>H-NOESY, <sup>1</sup>H-<sup>1</sup>H-COSY, <sup>1</sup>H-<sup>13</sup>C-gHSQC) and Varian Inova DMX-500 (<sup>13</sup>C) spectrometers, and referenced to SiMe<sub>4</sub> (<sup>1</sup>H, <sup>13</sup>C), H<sub>3</sub>PO<sub>4</sub> (<sup>31</sup>P) and H<sub>2</sub>PtCl<sub>6</sub> in D<sub>2</sub>O (<sup>195</sup>Pt).  $\delta$  values are given in ppm and  $J$  values in Hz. Abbreviations used: s = singlet; d = doublet; t = triplet; m = multiplet; br = broad; NMR labelling as shown in the attached numbering scheme.

#### Preparation of the compounds

*cis*-[Pt<sub>2</sub>(4-MeC<sub>6</sub>H<sub>4</sub>)<sub>4</sub>( $\mu$ -SEt<sub>2</sub>)<sub>2</sub>]<sup>1</sup> and ligands **1c-1e**<sup>2</sup> were prepared as reported elsewhere.

Compound [PtBr{CH<sub>2</sub>C<sub>6</sub>H<sub>2</sub>(CH<sub>3</sub>)<sub>2</sub>CHNCH<sub>2</sub>C<sub>6</sub>H<sub>4</sub>(4-CH<sub>3</sub>C<sub>6</sub>H<sub>4</sub>)}SEt<sub>2</sub>] (**2c**) was obtained from 68 mg (0.21 mmol) of imine **1c** and 100 mg (0.11 mmol) of compound *cis*-[Pt(4-C<sub>6</sub>H<sub>4</sub>CH<sub>3</sub>)<sub>2</sub>( $\mu$ -SEt<sub>2</sub>)<sub>2</sub>] in 20 mL of toluene. The mixture was heated for 4 hours under refluxing conditions. The solvent was removed in a rotary evaporator to yield a yellow oil which could not be purified due to its low stability. <sup>1</sup>H NMR (400 MHz, CDCl<sub>3</sub>):  $\delta$  = 8.23 [br, 1H, CHN]; {7.39 [m, 3H]; 7.23 [m, 1H]; 7.14 [m, 4H]; 6.72 [s, 1H, H<sup>1</sup> or H<sup>2</sup>]; 6.57 [s, 1H, H<sup>1</sup> or H<sup>2</sup>], aromatics}; 5.56 [s, <sup>3</sup>J(H-Pt) = 27.2, 2H, NCH<sub>2</sub>]; 3.10 [m, 2H, SCH<sub>2</sub>]; 2.70 [m, 2H, SCH<sub>2</sub>]; 2.35 [s, 3H, CH<sub>3</sub><sup>c</sup>]; 2.32 [m, 2H, CH<sub>2</sub>Pt]; {2.18 [s, 3H]; 1.92 [s, 3H], CH<sub>3</sub><sup>ab</sup>}; 1.24 [t, J(H-H) = 7.2, 6H, SCH<sub>2</sub>CH<sub>3</sub>].

Compound [PtBr{CH<sub>2</sub>C<sub>6</sub>H<sub>2</sub>(CH<sub>3</sub>)<sub>2</sub>CHNCH<sub>2</sub>C<sub>6</sub>H<sub>4</sub>(4-CH<sub>3</sub>C<sub>6</sub>H<sub>4</sub>)}PPh<sub>3</sub>] (**3c**) was obtained from 68 mg (0.21 mmol) of imine **1c** and 100 mg (0.11 mmol) of compound *cis*-[Pt(4-C<sub>6</sub>H<sub>4</sub>CH<sub>3</sub>)<sub>2</sub>(μ-SEt<sub>2</sub>)<sub>2</sub>] in toluene. The mixture was heated for 4 hours under refluxing conditions. The solvent was removed in a rotary evaporator and a solution of 56 mg of PPh<sub>3</sub> (0.21 mmol) in 20 mL of acetone was added to the residue. After stirring at room temperature for 2 hours, the solvent was partially removed and yellow crystals were formed. Yield: 97 mg (54%). <sup>1</sup>H NMR (400 MHz, CDCl<sub>3</sub>): δ = 8.30 [br. m, 1H, CHN]; 7.57-7.52 [m, 6H, PPh<sub>3</sub><sup>ortho</sup>]; 7.49-7.47 [m, 2H]; 7.40-7.31 [m, 11H, PPh<sub>3</sub><sup>meta, para</sup> + 2H]; 7.14 [dd, <sup>3</sup>J(H-H) = 8.0, 4H, H<sup>3,4</sup>]; 6.51 [s, 1H, H<sup>2</sup>]; 5.67 [d, <sup>4</sup>J(H-H) = 2.0, <sup>3</sup>J(H-Pt) = 32.0, CH<sub>2</sub>N]; 5.62 [s, 1H, H<sup>1</sup>]; 2.35 [s, 3H, Me<sup>c</sup>]; 2.06 [d, <sup>4</sup>J(H-P) = 4.0, <sup>3</sup>J(H-Pt) = 96.0, CH<sub>2</sub>Pt]; 2.02 [s, 3H, Me<sup>b</sup>]; 1.92 [s, 3H, Me<sup>a</sup>]. <sup>13</sup>C NMR (125.9 MHz, CDCl<sub>3</sub>): δ = 160.27 [s, CHN]; singlets at 145.10, 142.99, 141.63, 138.22, 137.84, 136.95, 133.11, 130.97, 130.49 [aromatic carbon atoms]; 134.86 [d, <sup>2</sup>J(C-P) = 11.0, PPh<sub>3</sub>, C<sup>ortho</sup>]; 130.16 [d, <sup>4</sup>J(C-P) = 2.0, PPh<sub>3</sub>, C<sup>para</sup>]; 129.15 [s, C<sup>3,4</sup>]; 127.75 [d, <sup>3</sup>J(C-P) = 11.0, PPh<sub>3</sub>, C<sup>meta</sup>]; singlets at 130.06; 129.95; 128.04; 127.42 [C<sup>5,6,7,8</sup>]; 126.80 [s, C<sup>2</sup>]; 125.37 [s, C<sup>1</sup>]; 63.77 [s, NCH<sub>2</sub>]; 21.36 [s, CH<sub>3</sub><sup>b</sup>]; 21.07 [s, CH<sub>3</sub><sup>c</sup>]; 18.40 [CH<sub>3</sub><sup>a</sup>]; 14.70 [d, <sup>1</sup>J(C-P) = 4.0, J(C-Pt) = 630.0, CH<sub>2</sub>Pt]. <sup>31</sup>P NMR (121.4 MHz, CDCl<sub>3</sub>): δ = 19.09 [s, J(P-Pt) = 4484.5]. <sup>195</sup>Pt NMR (54 MHz, CDCl<sub>3</sub>): δ = -4266.3 [d, J(P-Pt) = 4474.0]. **HR-ESI-MS**, m/z: 783.2458, calculated for C<sub>42</sub>H<sub>39</sub>NPt [M-Br] 783.2462; 824.2721, calculated for C<sub>44</sub>H<sub>42</sub>N<sub>2</sub>PPt [M-Br+CH<sub>3</sub>CN] 824.2727. **Anal. Found (calc. for C<sub>42</sub>H<sub>39</sub>BrNPt·CH<sub>2</sub>Cl<sub>2</sub>):** C: 54.2 (54.44); H: 4.2 (4.35); N: 1.6 (1.48).

Compound [PtCl{CH<sub>2</sub>C<sub>6</sub>H<sub>2</sub>(CH<sub>3</sub>)<sub>2</sub>CHNCH<sub>2</sub>C<sub>6</sub>H<sub>4</sub>(4-CH<sub>3</sub>C<sub>6</sub>H<sub>4</sub>)}PPh<sub>3</sub>] (**3d**) was obtained from 58 mg (0.21 mmol) of imine **1d** and 100 mg (0.11 mmol) of compound [Pt<sub>2</sub>(4-MeC<sub>6</sub>H<sub>4</sub>)<sub>2</sub>(μ-SEt<sub>2</sub>)<sub>2</sub>] in 20 mL of toluene. The mixture was heated for 4 hours under refluxing conditions. The solvent was removed in a rotary evaporator and a solution of 56 mg of PPh<sub>3</sub> (0.21 mmol) in 20 mL of acetone was added to the residue. After stirring at room temperature for 2 hours, the solvent was partially removed and yellow crystals were formed. Yield: 110 mg (63%). <sup>1</sup>H NMR (400 MHz, CDCl<sub>3</sub>): δ = 8.26 [br. m, 1H, CHN]; 7.46 [m, 2H]; 7.40-7.30 [m, 11H]; 7.14 [m, 4H]; 6.52 [s, 1H, H<sup>2</sup>]; 5.71 [s, 1H, H<sup>1</sup>]; 5.59 [d, <sup>4</sup>J(H-H) = 2.0, 2H, CH<sub>2</sub>N]; 2.35 [s, 3H, Me<sup>c</sup>]; 2.05 [d, <sup>4</sup>J(H-P) = 4.0, CH<sub>2</sub>Pt]; 2.04 [s, 3H, Me<sup>b</sup>]; 1.93 [s, 3H, Me<sup>a</sup>]. <sup>31</sup>P NMR (121.4 MHz, CDCl<sub>3</sub>): δ = 18.54 [s, J(P-Pt) = 4482.1]. **ESI-MS**, m/z: 783.26 [M-Cl]<sup>+</sup>. **Anal. Found (calc. for C<sub>42</sub>H<sub>39</sub>CINPpt):** C: 61.3 (61.57); H: 5.3 (4.80); N: 2.0 (1.71).

**Numbering scheme:**

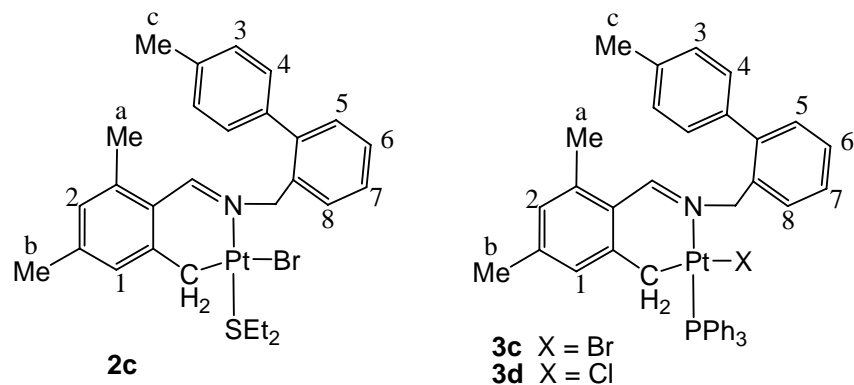

**X-Ray Structure Analysis of 3c**

A prismatic crystal was selected and mounted on a MAR345 diffractometer with an image plate detector. Intensities were collected with graphite monochromatized Mo K $\alpha$  radiation. The structure was solved by direct methods using SHELXS computer program<sup>3</sup> and refined by the full-matrix least-squares method, with the SHELXL97 computer program using 16366 reflections (very negative intensities were not assumed). All hydrogen atoms were computed and refined, using a riding model, with an isotropic temperature factor equal to 1.2 time the equivalent temperature factor of the atom to which they are linked. Further details are given in Table 1.

**References**

- 1.- Steele, B.R.; Vrieze, K., *Trans. Met. Chem.* **1977**, 2, 140.
- 2.- a) Crespo, M.; Martinez, M.; Sales, J.; Solans, X.; Font-Bardia, M. *Organometallics* **1992**, 11, 1288. b) Capapé, A.; Crespo, M.; Granell, J.; Font-Bardía, M.; Solans, X. *Dalton Trans.* **2007**, 2030.
- 3.- Sheldrick, G.M. SHELXS97, A Computer Program for Crystal Structure Determination, University of Göttingen: Germany, 1997.

**Table 1.- Crystallographic and refinement data for compound 3c.**

|                                  |                                                         |
|----------------------------------|---------------------------------------------------------|
| Formula                          | C <sub>42</sub> H <sub>39</sub> BrNPt, H <sub>2</sub> O |
| Fw                               | 881.73                                                  |
| temp, K                          | 293(2)                                                  |
| wavelength, Å                    | 0.71073                                                 |
| crystal system                   | Triclinic                                               |
| space group                      | P-1                                                     |
| a, Å                             | 12.032(5)                                               |
| b, Å                             | 12.230(4)                                               |
| c, Å                             | 12.715(3)                                               |
| α, deg                           | 81.08(2)                                                |
| β, deg                           | 72.52(2)                                                |
| γ, deg                           | 79.01(2)                                                |
| V, Å <sup>3</sup> ; Z            | 17742.3(10); 2                                          |
| d (calcd), Mg/m <sup>3</sup>     | 1.681                                                   |
| abs coeff, mm <sup>-1</sup>      | 5.254                                                   |
| F(000)                           | 872                                                     |
| rlns coll. / unique              | 16366 / 8758 [R(int) = 0.0627]                          |
| Data/restraint/parameters        | 8758 / 2 / 435                                          |
| GOF on F <sup>2</sup>            | 1.087                                                   |
| R <sub>1</sub> (I>2σ(I))         | 0.0550                                                  |
| wR <sub>2</sub> (all data)       | 0.1579                                                  |
| peak and hole, e.Å <sup>-3</sup> | 1.802 and -2.558                                        |

**Table 2.- Selected bond lengths (Å) and angles (deg.) for compound 3c with estimated standard deviations.**

|                   |            |
|-------------------|------------|
| Pt-C(22)          | 1.988(6)   |
| Pt-N              | 2.055(4)   |
| Pt-P              | 2.1801(16) |
| Pt-Br             | 2.4417(10) |
| N-C(15)           | 1.204(7)   |
| N-C(1)            | 1.487(7)   |
| C(1)-C(2)         | 1.547(8)   |
| C(2)-C(3)         | 1.349(9)   |
| C(2)-C(7)         | 1.362(8)   |
| C(3)-C(4)         | 1.381(10)  |
| C(4)-C(5)         | 1.339(10)  |
| C(5)-C(6)         | 1.360(9)   |
| C(6)-C(7)         | 1.384(9)   |
| C(7)-C(8)         | 1.350(8)   |
| C(8)-C(9)         | 1.359(10)  |
| C(8)-C(13)        | 1.392(9)   |
| C(9)-C(10)        | 1.346(10)  |
| C(10)-C(11)       | 1.383(13)  |
| C(11)-C(12)       | 1.370(13)  |
| C(11)-C(14)       | 1.412(13)  |
| C(12)-C(13)       | 1.353(10)  |
| C(15)-C(16)       | 1.414(9)   |
| C(16)-C(17)       | 1.373(9)   |
| C(16)-C(21)       | 1.398(9)   |
| C(17)-C(18)       | 1.386(10)  |
| C(17)-C(23)       | 1.543(10)  |
| C(18)-C(19)       | 1.385(10)  |
| C(19)-C(20)       | 1.374(9)   |
| C(19)-C(24)       | 1.459(11)  |
| C(20)-C(21)       | 1.383(9)   |
| C(21)-C(22)       | 1.443(8)   |
| <br>              |            |
| C(22)-Pt-N        | 86.8(2)    |
| C(22)-Pt-P        | 90.32(17)  |
| N-Pt-P            | 176.63(12) |
| C(22)-Pt-Br       | 174.40(17) |
| N-Pt-Br           | 87.73(13)  |
| P-Pt-Br           | 95.11(5)   |
| C(15)-N-C(1)      | 117.3(5)   |
| C(15)-N-Pt        | 122.5(4)   |
| C(1)-N-Pt         | 119.8(3)   |
| N-C(15)-C(16)     | 123.3(6)   |
| C(21)-C(16)-C(15) | 120.7(6)   |
| C(16)-C(21)-C(22) | 124.5(6)   |
| C(21)-C(22)-Pt    | 104.0(4)   |
